# Supplementary material for: From Microscale Interactions to Macroscale Patterns in Copepod-Crinoid Symbiosis
Source: Preprints.org preprint supplement (doi:10.20944/preprints202312.0238.v1), 2023-12-05
Supplement: Supplementary file 1 [file supplementary]

**Table S2**. Crinoids of the World as hosts of copepod crustaceans

| **Invertebrate Host (valid name and as indicated in the original record)** | **Copepod species name** | **Copepod family abbreviation*** | **Symbiosis nature abbreviation **** | **Country abbrevatiation ***** | **Depths** | **Reference** |
| --- | --- | --- | --- | --- | --- | --- |
| Comatulida | *Asterocheres crinoidicola* Humes, 2000 | A | ec | JM |  | Kim, 2010 |
|  | *Asterocheres spinopaulus* Johnsson, 1998 | A | ec | BR |  | Johnsson, 2002 |
|  | *Pseudanthessius madrasensis* Reddiah, 1968 | P | ec | IN |  | Reddiah, 1968 |
| Antedonidae |  |  |  |  |  |  |
| *Antedon bifida* (Pennant, 1777) | *Enterognathus comatulae* Giesbrecht, 1900 | E | en | GB, IE |  | Grainger, 1950 |
| *Antedon mediterranea* (Lamarck, 1816) | *Enterognathus comatulae* Giesbrecht, 1900 | E | en | FR, IT |  | Changeux, Delamare Deboutteville, 1956, Giesbrecht, 1900, Stock, 1959 |
| Charitometridae |  |  |  |  |  |  |
| *Glyptometra crassa* (Clark, 1912) | *Parenterognathus troglodytes* Ohtsuka, Kitazawa, Boxshall, 2010 | E | en | JP | 775, 780.8 - 781.1 | Ohtsuka, Kitazawa, Boxshall, 2010 |
| Colobometridae |  |  |  |  |  |  |
| *Cenometra emendatrix* (Bell, 1892) | *Doridicola patulus* (Humes, 1959) | R | ec | MG | 20 | Humes, Stock, 1973 |
| *Cenometra emendatrix* (Bell, 1892) | *Doridicola venustus* (Humes, 1958) | R | ec | MG | 20 | Humes, Stock, 1973 |
| *Cenometra emendatrix* (Bell, 1892) | *Pseudanthessius major* Stock, 1967 | P | ec | MG | 10, 20 | Stock, 1967 |
| *Decametra chadwicki* (Clark, 1911) | *Entherognathus lateripes* Stock, 1966 | E | en | IL | 20 | Stock, 1966 |
| *Oligometra serripinna* (Carpenter, 1811) | *Collocheres uncinatus* Stock, 1966 | A | ec | IL | 20 | Stock, 1966 |
| *Oligometra serripinna* (Carpenter, 1811) | *Critomolgus fishelsoni* (Stock, 1967) | R | ec | IL | 20 | Stock, 1967 |
| *Oligometra serripinna* (Carpenter, 1811) | *Entherognathus lateripes* Stock, 1966 | E | en | IL | 20 | Stock, 1966 |
| Comasteridae |  |  |  |  |  |  |
| *Anneissia bennetti* (Müller, 1841) | *Pseudanthessius comanthi* Humes, 1972 | P | ec | MH | 4, 8 | Humes, 1972 |
| *Anneissia japonica* (Müller, 1841) | *Collocheres inaequalis* Ho, 1982 | A | ec | JP |  | Ho, 1982 |
| *Anneissia japonica* (Müller, 1841) | *Collocheres solidus* Shin, Kim, 2004 | A | ec | KP | 25 | Shin, Kim, 2004 |
| *Anneissia solaster* (Clark, 1907) | *Collocheres brevipes* Shin, Kim, 2004 | A | ec | KP | 25, 40 | Shin, Kim, 2004 |
| *Anneissia solaster* (Clark, 1907) | *Collocheres solidus* Shin, Kim, 2004 | A | ec | KP | 25, 40 | Shin, Kim, 2004 |
| *Capillaster multiradiatus* (Linnaeus, 1758) | *Collocheres prionotus* Humes, 1990 | A | ec | ID, MG | 0.5, 1 | Humes, 1990 |
| *Capillaster multiradiatus* (Linnaeus, 1758) | *Collocheres uncinatus* Stock, 1966 | A | ec | ID, MG | 0.5, 1, 3 | Humes, 1990 |
| *Capillaster multiradiatus* (Linnaeus, 1758) | *Scambicornus pillaii* Stock, 1983 | S | ec | IL | 1 | Stock, 1983 |
| *Comanthus sp.* | *Collocheres comanthiphilus* Humes, 1987 | A | ec | NC | 1, 3 | Humes, 1987 |
| *Comanthus briareus* (Bell, 1882) | *Collocheres amicus* Kim, 2007 | A | ec | ID | 17 | Kim, 2007 |
| *Comanthus briareus* (Bell, 1882) | *Collocheres humesi* Kim, 2007 | A | ec | ID | 17 | Kim, 2007 |
| *Comanthus briareus* (Bell, 1882) | *Collocheres serrulatus* Humes, 1987 | A | ec | ID | 10 | Humes, 1987 |
| *Comanthus briareus* (Bell, 1882) | *Collocheres thysanotus* Humes, 1987 | A | ec | AU | 9 | Humes, 1987 |
| *Comanthus parvicirrus* (Müller, 1841) | *Collocheres comanthiphilus* Humes, 1987 | A | ec | NC | 1.5, 5 | Humes, 1987 |
| *Comanthus parvicirrus* (Müller, 1841) | *Glyptocheres extrusus* Humes, 1987 | A | ec | NC | 1.5 | Humes, 1987 |
| *Comanthus wahlbergii* (Müller, 1843) | *Collocheres comanthiphilus* Humes, 1987 | A | ec | ID, NC | 0.5, 2, 25 | Humes, 1987 |
| *Comanthus wahlbergii* (Müller, 1843) | *Glyptocheres extrusus* Humes, 1987 | A | ec | ID | 25 | Humes, 1987 |
| *Comanthus wahlbergii* (Müller, 1843) | *Pseudanthessius comanthi* Humes, 1972 | P | ec | ID | 25 | Humes, 1987 |
| *Comaster multifidus* (Müller, 1841) | *Collocheres marginatus* Humes, 1987 | A | ec | AU | 9 | Humes, 1987 |
| *Comaster multifidus* (Müller, 1841) | *Collocheres thysanotus* Humes, 1987 | A | ec | AU | 9 | Humes, 1987 |
| *Comaster schlegeli* (Carpenter, 1881) | *Glyptocheres comanthinae* Humes, 1987 | A | ec | ID | 4 | Humes, 1987 |
| *Davidaster rubiginosus* (Pourtalès, 1869) | *Asterocheres crinoidicola* Humes, 2000 | A | ec | BZ | 12.2 | Humes, 2000 |
| *Nemaster grandis* Clark, 1909 | *Asterocheres crinoidicola* Humes, 2000 | A | ec | BZ | 32.2 | Humes, 2000 |
| *Oxycomanthus bennetti* (Müller, 1841)  (= *Comanthus bennetti* (Müller, 1841)) | *Collocheres comanthiphilus* Humes, 1987 | A | ec | AU, ID, PH | 2, 3, 4, 12, 40 | Humes, 1987 |
| *Oxycomanthus bennetti* (Müller, 1841)  (= *Comanthus bennetti* (Müller, 1841)) | *Glyptocheres extrusus* Humes, 1987 | A | ec | AU, ID, PH | 2, 3, 4, 12, 40 | Humes, 1987 |
| *Oxycomanthus bennetti* (Müller, 1841)  (= *Comanthus bennetti* (Müller, 1841)) | *Pseudanthessius comanthi* Humes, 1972 | P | ec | AU, ID, PH | 2, 3, 4, 10, 12, 40 | Humes, 1987 |
| *Phanogenia distincta* (Carpenter, 1888)  (= *Comaster distinctus* (Carpenter, 1888)) | *Pseudanthessius rostellatus* Humes, Ho, 1970 | P | ec | MG | 47 | Humes, Ho, 1970 |
| *Phanogenia gracilis* (Hartlaub, 1893)  (= *Comaster gracilis* (Hartlaub, 1893)) | *Collocheres titillator* Humes, 1987 | A | ec | ID | 10 | Humes, 1987 |
| *Phanogenia multibrachiata* (Carpenter, 1888) (= *Comaster multibrachiatus* (Carpenter, 1888)) | *Collocheres inflatiseta* Humes, 1987 | A | ec | ID | 10 | Humes, 1987 |
| *Phanogenia multibrachiata* (Carpenter, 1888) (= *Comaster multibrachiatus* (Carpenter, 1888)) | *Collocheres parvus* Humes, 1987 | A | ec | ID | 10 | Humes, 1987 |
| Himerometridae |  |  |  |  |  |  |
| *Heterometra africana* (Clark, 1911) | *Pseudanthessius major* Stock, 1967 | P | ec | MG | 17, 18, 25, 29, 34 | Stock, 1967 |
| *Heterometra africana* (Clark, 1911) | *Pseudanthessius minor* Stock, 1967 | P | ec | MG | 18 | Stock, 1967 |
| *Heterometra savignii* (Müller, 1841) (= *Heterometra savignyi* (Müller, 1841)) | *Collocheres uncinatus* Stock, 1966 | A | ec | IL | 1, 15 | Stock, 1966 |
| *Heterometra savignii* (Müller, 1841) (= *Heterometra savignyi* (Müller, 1841)) | *Entherognathus lateripes* Stock, 1966 | E | en | IL | 10 | Stock, 1966 |
| *Heterometra savignii* (Müller, 1841) (= *Heterometra savignyi* (Müller, 1841)) | *Kelleria gradata* Stock, 1967 | K | ec | IL | 15 | Stock, 1967 |
| *Heterometra savignii* (Müller, 1841) (= *Heterometra savignyi* (Müller, 1841)) | *Pseudanthessius major* Stock, 1967 | P | ec | IL | 10, 15 | Stock, 1967 |
| *Himerometra robustipinna* (Carpenter, 1881) | *Pseudanthessius major* Stock, 1967 | P | ec | NC | 1 | Humes, 1977 |
| *Himerometra robustipinna* (Carpenter, 1881) | *Pseudanthessius planus* Kim, 2007 | P | ec | ID | 2 | Kim, 2007 |
| *Mariametridae* |  |  |  |  |  |  |
| *Dichrometra flagellata* (Müller, 1841) | *Pseudanthessius angularis* Humes, Ho, 1970 | P | ec | MG | 1 | Humes, Ho, 1970 |
| *Dichrometra flagellata* (Müller, 1841) | *Pseudanthessius major* Stock, 1967 | P | ec | MG | 1, 2, 6 | Stock, 1967 |
| *Dichrometra flagellata* (Müller, 1841) | *Pseudanthessius minor* Stock, 1967 | P | ec | MG | 2 | Stock, 1967 |
| *Lamprometra palmata* (Müller, 1841) (= *Lamprometra klunzingeri* (Hartlaub, 1890)) | *Pseudanthessius major* Stock, 1967 | P | ec | MG | 1, 13 | Stock, 1967 |
| *Lamprometra palmata* (Müller, 1841) (= *Lamprometra klunzingeri* (Hartlaub, 1890)) | *Pseudanthessius minor* Stock, 1967 | P | ec | IL, MG | 0.5, 13 | Stock, 1967 |
| *Lamprometra sp.* | *Enterognathus inabai* Ohtsuka, Shimomura, Kitazawa, 2012 | E | en | JP | 46.7 | Ohtsuka, Shimomura, Kitazawa, 2012 |
| *Liparometra sp.* | *Pseudanthessius minor* Stock, 1967 | P | ec | MG | 15, 23, 35 | Stock, 1967 |
| *Liparometra sp.* | *Pseudanthessius angularis* Humes, Ho, 1970 | P | ec | MG | 15, 23, 35 | Stock, 1967 |
| *Stephanometra indica* (Smith, 1876) (= *Stephanometra spicata* (Carpenter, 1881)) | *Pseudanthessius major* Stock, 1967 | P | ec | MG | 2, 6 | Humes, Ho, 1970 |
| *Stephanometra indica* (Smith, 1876) (= *Stephanometra spicata* (Carpenter, 1881)) | *Pseudanthessius major* Stock, 1967 | P | ec | MG | 2, 13, 17 | Stock, 1967 |
| *Stephanometra indica* (Smith, 1876) (= *Stephanometra spicata* (Carpenter, 1881)) | *Pseudanthessius major* Stock, 1967 | P | ec | NC | 3 | Humes, 1977 |
| Tropiometridae |  |  |  |  |  |  |
| *Tropiometra afra* (Hartlaub, 1890) | *Pseudanthessius madrasensis* Reddiah, 1968 | P | ec | NC | 1.5, 2, 3 | Humes, 1977 |
| *Tropiometra carinata* (Lamarck, 1816) | *Pseudanthessius madrasensis* Reddiah, 1968 | P | ec | MG | 0.5, 1, 1.5, 2, 3, 15 | Humes, Ho, 1970 |
| Zygometridae |  |  |  |  |  |  |
| *Catoptometra rubroflava* (Clark, 1908) | *Collocheres tamladus* Shin, Kim, 2004 | A | ec | KP |  | Shin, Kim, 2004 |

* Copepod family Abbreviation: A – Asterocheridae, E – Enterognathidae, K – Kelleriidae, P – Pseudanthessiidae, R – Rhynchomolgidae, S – Synapticolidae.

** Symbiosis nature abbreviation: ec – ectosymbiont, en – endosymbiont.

*** Country abbreviation: AU – Australia, BR – Brazil, BZ – Belize, FR – France, GB – United Kingdom, ID – Indonesia, IE – Ireland, IL – Israel, IN – India, IT – Italy, JM – Jamaica, JP – Japan, KP – Korea, MG – Madagascar, MH – Marshall Islands, NC – New Caledonia, PH – Philippines.
